# Supplementary material
Source: PubMed Central journal article supplement (PMC2860902)
Supplement: JCI41072sd.pdf [file JCI41072sd.pdf]

**SUPPLEMENTAL DATA for**

**Altered regulatory T-cell homeostasis in patients with CD4 lymphopenia  
following allogeneic hematopoietic stem cell transplantation**

Ken-ichi Matsuoka<sup>1,6</sup>, Haesook T. Kim<sup>2,3,5</sup>, Sean McDonough<sup>1</sup>, Gregory Bascug<sup>1</sup>,  
Ben Warshauer<sup>1</sup>, John Koreth<sup>1,6</sup>, Corey Cutler<sup>1,6</sup>, Vincent T. Ho<sup>1,6</sup>, Edwin P. Alyea<sup>1,6</sup>,  
Joseph H. Antin<sup>1,6</sup>, Robert J. Soiffer<sup>1,6</sup> and Jerome Ritz<sup>1,3,4,6</sup>

<sup>1</sup> Division of Hematologic Malignancies, <sup>2</sup> Department of Biostatistics and Computational  
Biology, <sup>3</sup> Cancer Vaccine Center, Dana-Farber Cancer Institute

<sup>4</sup> Harvard Stem Cell Institute

<sup>5</sup> Harvard School of Public Health

<sup>6</sup> Harvard Medical School, Boston, MA,

**This file includes:**

Supplemental Figure 1,2.

Supplemental Table 1.

**Corresponding Author:**

Jerome Ritz, MD

Email: [Jerome\\_Ritz@dfci.harvard.edu](mailto:Jerome_Ritz@dfci.harvard.edu)

## Supplemental Figure 1.

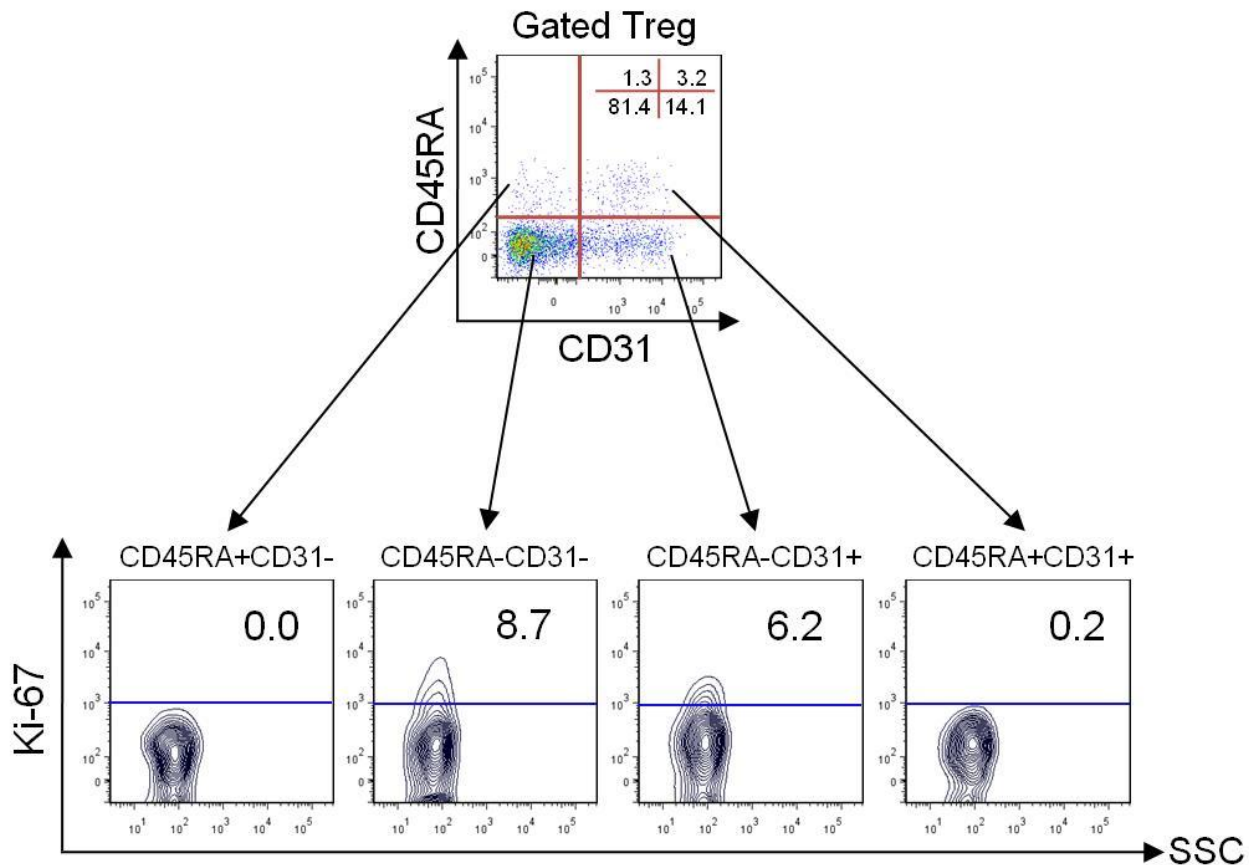

### Supplemental Figure 1. CD45RA<sup>+</sup>CD31<sup>+</sup> RTE Treg contain few Ki-67 expressing cells.

PBMC were incubated with the following directly conjugated monoclonal antibodies for 20 minutes at 4°C: anti-CD4-Pacific Blue (clone RPA-T4; BD Biosciences), anti-CD25-PC7 (clone M-A251; BD Biosciences), anti-CD45RA-FITC (clone M-A251; Beckman Coulter), anti-CD127-APC-Alexa Fluor® 750 (clone eBioRDR5; eBioscience) and anti-CD31-APC (clone WM59; eBioscience). Surface-stained PBMC were processed using Fixation/Permeabilization buffer (BD Biosciences) and incubated with PE-conjugated anti-Ki-67 antibody (clone B56; BD Biosciences) for 30 minutes at room temperature. CD4 Treg defined as CD4<sup>+</sup>CD25<sup>med-high</sup>CD127<sup>low</sup> were further divided into 4 subpopulations by the expression of CD45RA and CD31. Expression of Ki-67 was determined on each Treg subset. Representative flow cytometry profiles from 11 post-HSCT patients are shown. *Top*: A representative panel for identification of 4 subpopulations based on the expression of CD45RA and CD31 is shown. *Bottom*: Ki-67 expression in 4 gated subpopulations of Treg are shown. RTE Treg are identified as CD45RA<sup>+</sup>CD31<sup>+</sup>. The blue line indicates the negative control for Ki-67 expression defined by isotype IgG control.

## Supplemental Figure 2.

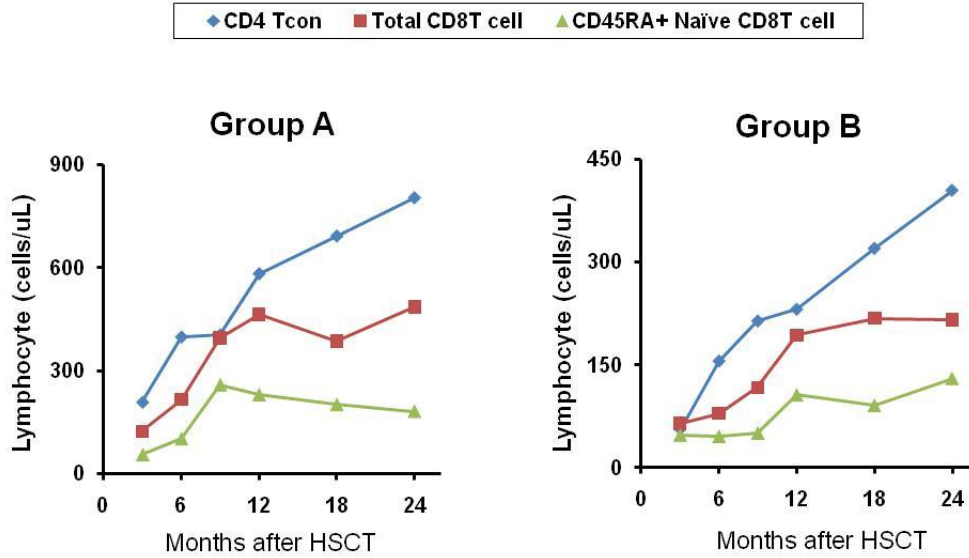

**Supplemental Figure 2. Recovery of CD8 T cells and CD8 subsets in Cohort 1, Group A and B, during the 2 year observation period.** The reconstitution of CD8 T cells was prospectively monitored and compared to CD4 Tcon. CD8 T cell subsets were defined using the following antibodies; anti-CD3-PC5 (clone UCHT1; Beckman Coulter), anti-CD8-PC7 (clone SFC121Thy2D3; Beckman Coulter) and anti-CD45RA-FITC (clone M-A251; Beckman Coulter). Note the scale of Y-axis for Group B is half of the scale shown for Group A.

# Supplemental Table 1

## Characterization of hematopoietic stem cell products

| Surface Antigen | Cohort 1 |                   |                   |                   | Cohort 2 |                   |                   |                   | P-value Cohort 1 vs 2 |
|-----------------|----------|-------------------|-------------------|-------------------|----------|-------------------|-------------------|-------------------|-----------------------|
|                 | N        | Median            | Min               | Max               | N        | Median            | Min               | Max               |                       |
| CD34            | 33       | $9.2 \times 10^6$ | $2.6 \times 10^5$ | $1.5 \times 10^7$ | 45       | $7.9 \times 10^6$ | $2.0 \times 10^6$ | $1.8 \times 10^7$ | 0.94                  |
| CD3             | 22       | $3.1 \times 10^8$ | $1.0 \times 10^8$ | $5.7 \times 10^8$ | 33       | $3.4 \times 10^8$ | $3.2 \times 10^7$ | $7.6 \times 10^9$ | 0.25                  |
| CD4             | 22       | $1.9 \times 10^8$ | $4.9 \times 10^7$ | $3.4 \times 10^8$ | 33       | $2.0 \times 10^8$ | $3.0 \times 10^7$ | $5.9 \times 10^8$ | 0.55                  |
| CD8             | 22       | $1.0 \times 10^8$ | $4.0 \times 10^7$ | $2.4 \times 10^8$ | 33       | $1.2 \times 10^8$ | $2.2 \times 10^7$ | $3.7 \times 10^8$ | 0.17                  |
| CD56            | 22       | $3.9 \times 10^7$ | $1.1 \times 10^7$ | $7.0 \times 10^7$ | 33       | $4.4 \times 10^7$ | $5.0 \times 10^6$ | $1.4 \times 10^8$ | 0.84                  |
| CD20            | 18       | $2.6 \times 10^7$ | $1.0 \times 10^6$ | $8.4 \times 10^7$ | 6        | $4.9 \times 10^7$ | $2.5 \times 10^6$ | $1.1 \times 10^8$ | 0.053                 |

Values represent the median number of cells (/kg recipient weight) expressing corresponding surface antigens in the infused stem cell product for patients in Cohort 1 and 2.
